# Supplementary material
Source: PubMed Central journal article supplement (PMC2941801)
Supplement: NIHMS230764-supplement-Supp1.pdf [file NIHMS230764-supplement-Supp1.pdf]

**Excitatory glycine responses of CNS myelin mediated by NR1/NR3 ‘NMDA’ receptor subunits**

Juan C. Piña-Crespo, Maria Talantova, Ileana Micu, Bradley States, H.-S. Vincent Chen,  
Shichun Tu, Nobuki Nakanishi, Gary Tong, Dongxian Zhang, Stephen F. Heinemann,  
Gerald W. Zamponi, Peter K. Stys & Stuart A. Lipton

**Supplemental material:**

- **Supplemental figures 1 - 4**
- **Supplemental table 1**
- **Supplemental references**

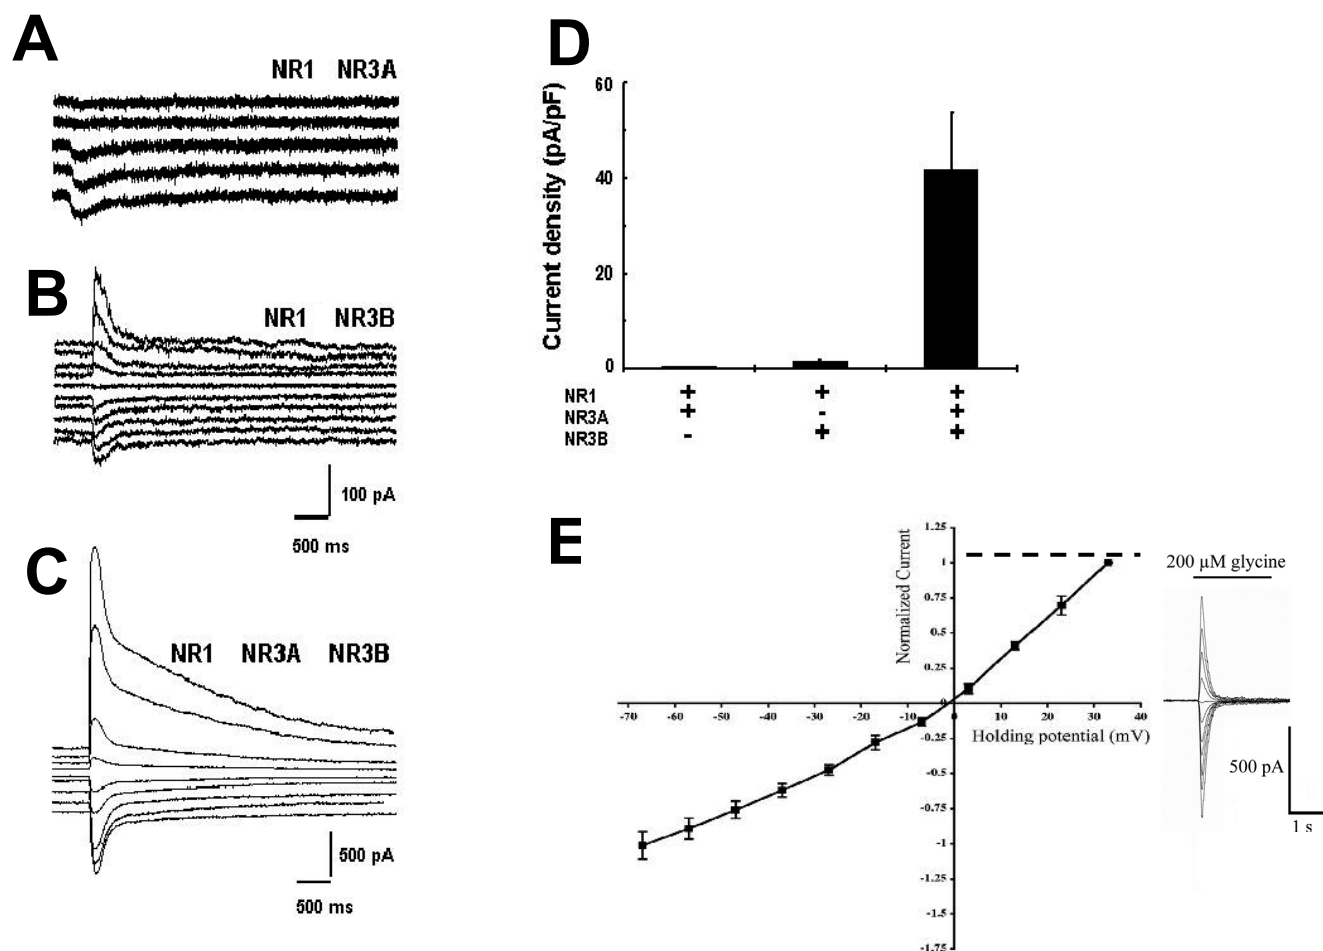

Supplementary Figure 1: Functional expression of recombinant NR1/NR3 receptors after transient co-transfection in mammalian HEK293 cells. HEK293 cells were transfected with the following subunit combinations: NR1 (NR1 or NR1-GFP) plus NR3A (NR3A or NR3A-YFP), or NR1 (NR1 or NR1-GFP) plus NR3B. When expression was assayed 24 to 72 hours post-transfection, we detected functional receptors activated by glycine in about 10% of all GFP-positive cells. **A-C**, Whole-cell responses recorded at different membrane potentials from HEK293 cells transduced with **A**, NR1/NR3A (1:2 ratio), **B**, NR1/NR3B (1:2 ratio), or **C**, NR1/NR3A/NR3B subunits (1:2:2 ratio). Whole-cell currents in response to a 300 ms application of glycine. **D**, Mean current density of whole-cell responses to glycine ( $n = 8$  for each condition). **E**, Current-voltage ( $I/V$ ) relationship for cells transfected with NR1/NR3A-YFP/NR3B. Recordings were performed during application of glycine at holding potentials between -80 and +30 mV. Mean current-density values were very small in response to application of glycine concentrations of 10  $\mu$ M up to 1 mM for NR1/NR3A (0.3 pA/pF) and NR1/NR3B (1.5  $\pm$  0.5 pA/pF) receptors ( $n = 5$  each). NR1/NR3A/NR3B receptors yielded a larger mean current density of 41  $\pm$  12 pA/pF ( $n = 10$ ). Glycine-evoked currents were excitatory in nature since they reversed at  $\sim$ 0 mV in the presence of symmetrical cation and asymmetrical anion solutions on either side of the membrane (*inset at right*;  $n = 6$ ).

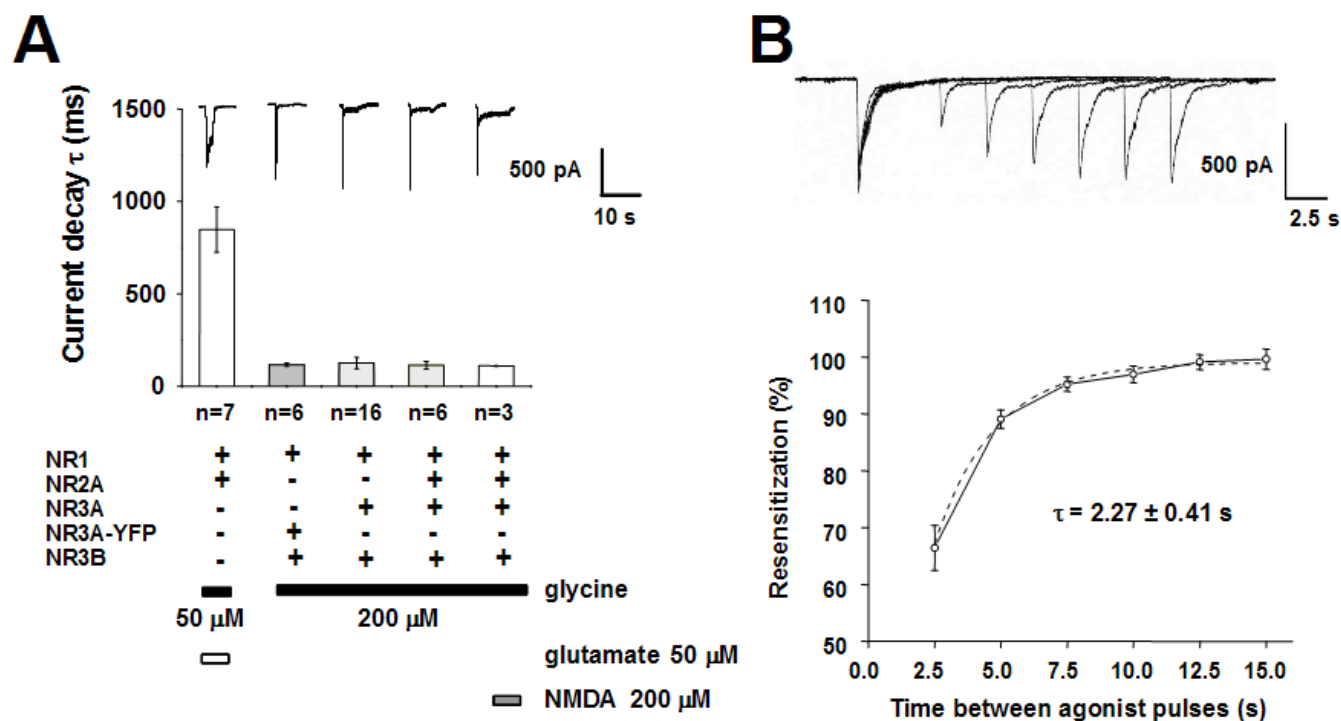

Supplementary Figure 2: NR1/NR3 receptors expressed in HEK293 cells have distinctive desensitization and re-sensitization kinetics. *A*, We analyzed the kinetics of NR1/NR3 receptors by comparing the decay of NMDA and/or glycine-evoked whole-cell currents in HEK293 cells transfected with NR1/NR3A/NR3B subunits versus classical NR1/NR2A NMDARs. Use of a fast application system revealed currents with a large rapidly desensitizing component ( $91 \pm 1.8\%$  of peak amplitude;  $n=15$ ) and a smaller but persistent non-desensitizing component ( $9 \pm 1.8\%$  of peak amplitude;  $n=15$ ) for NR1/NR3 receptors. The desensitizing component in NR1/NR3 receptor-mediated responses had mean decay time constants of about 100 ms compared to 800 ms for NR1/NR2A receptors (Supplementary Table 1). *B*, Recovery of glycine-evoked current from desensitization. Complete recovery (re-sensitization) was achieved 7.5 s after the end of the conditioning pulse ( $\tau_{1/2} = 2.27 \pm 0.41$  s). To analyze recovery from desensitization, we applied test applications of 200  $\mu$ M glycine at increments of 2.5 seconds to cells expressing NR1/NR3A/NR3B receptors. We observed  $\sim 93\%$  recovery of the control response within 5 seconds of the first application of agonist and complete recovery within 7.5 s of the first agonist application. Recovery from desensitization occurred with a time constant  $\tau = 2.27 \pm 0.41$  s ( $n = 6$ ). No currents were observed when glycine was applied to non-transfected cells ( $n = 11$ ) or to cells transfected with a single subunit (NR1, NR3A or NR3B;  $n = 17$ ; data not shown). Holding potential, -60 mV.

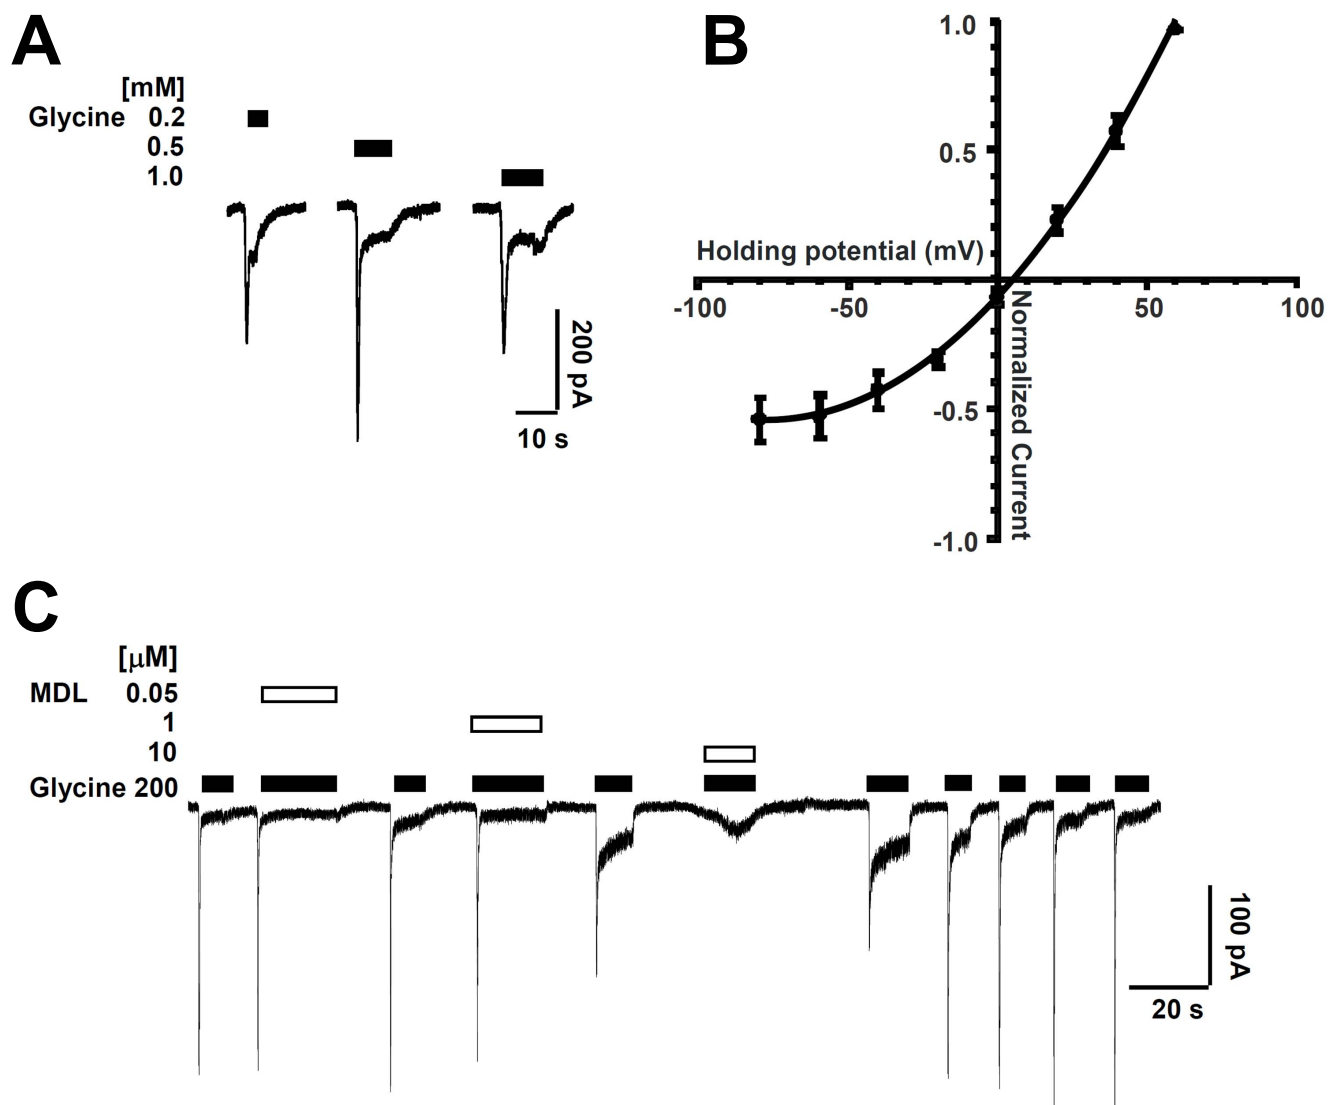

Supplementary Figure 3: Pharmacological properties of recombinant NR1/NR3 receptors expressed in HEK293 cells. Application of 200- $\mu$ M glycine evoked currents in about 60% of cells (threshold of response,  $\sim$ 100  $\mu$ M glycine). **A**, Concentrations of 200  $\mu$ M to 1 mM glycine produced desensitization, with progressively smaller peak amplitude and tail currents at higher concentrations. **B**, Glycine-evoked currents were observed in the presence of 1 mM external  $Mg^{2+}$  at a holding potential of -60 mV, although some degree of blockade developed at more negative potentials. **C**, MDL-105,519 [(E)-3-(2-phenyl-2-carboxyethenyl)-4, 6-dichloro-1H-indole-2-carboxylic acid], an antagonist of the NR1 glycine binding-site (Baron *et al.* 1996), exhibited a long-lasting, dual-effect on glycine-evoked currents, inhibiting peak current but potentiating steady-state current. The glycine-binding site antagonist 5,7-dichlorokynurenic acid (5,7-dichloro-4-hydroxyquinoline-2-carboxylic acid; DCKA; Baron *et al.* 1991) had similar dual effects on glycine-evoked currents (data not shown). Effects were concentration-dependent and reversible. Complete recovery of peak and steady-state responses from antagonist usually occurred within 3 min. Holding potential, -60 mV.

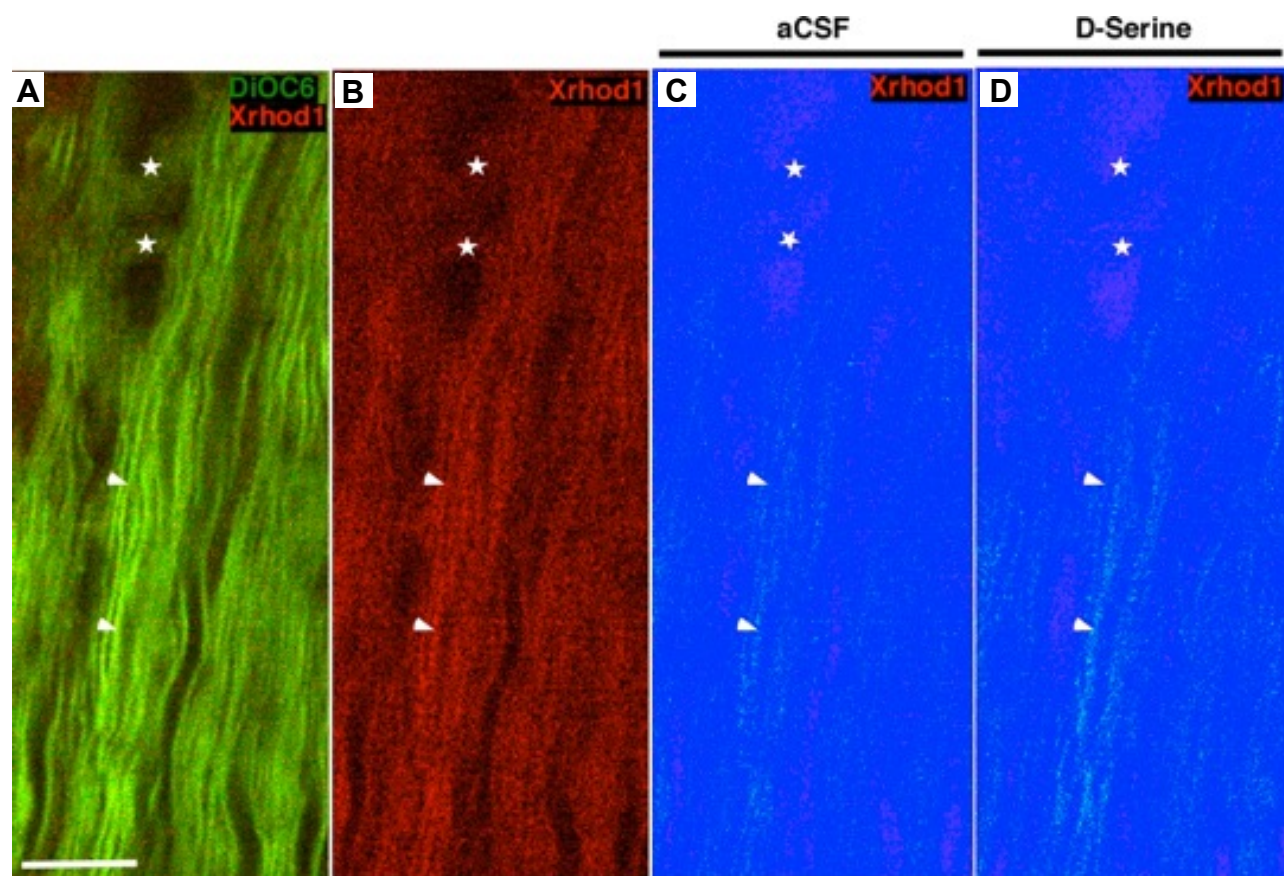

Supplementary Figure 4: D-serine induces  $\text{Ca}^{2+}$  accumulation in the myelin compartment. **A**, Two photon-excited image of the rat optic nerve co-loaded with ion insensitive DiOC6 (green) to visualize myelin (arrowheads) and oligodendrocytes (stars) and with the calcium-sensitive dye Xrhod1 (red). **B**, Same image as **A** showing only Xrhod1 channel. **C**, Same image as in **B** showing Xrhod1 fluorescence in pseudocolor during exposure to normal oxygenated aCSF. **D**, D-Serine application induced  $\text{Ca}^{2+}$  accumulation in the cytoplasmic compartment of myelin (arrowheads) but not in oligodendrocytes (stars). Scale bar, 10  $\mu\text{m}$ .

## Supplemental Table 1

## Decay time constants of glycine or glycine/glutamate evoked currents.

| Subunit composition                | Agonist(s)                                 | Decay time constant, ms |
|------------------------------------|--------------------------------------------|-------------------------|
| NR1/NR2A<br><i>n</i> = 7           | Glycine 20 $\mu$ M<br>Glutamate 50 $\mu$ M | 846.5 $\pm$ 122.9       |
| NR1/NR3A-YFP/NR3B<br><i>n</i> = 6  | Glycine 200 $\mu$ M                        | 116.0 $\pm$ 9.4         |
| NR1/NR3A/NR3B<br><i>n</i> = 16     | Glycine 200 $\mu$ M                        | 124.2 $\pm$ 30.5        |
| NR1/NR2A/NR3A/NR3B<br><i>n</i> = 6 | Glycine 200 $\mu$ M                        | 112.8 $\pm$ 20.43       |
| NR1/NR2A/NR3A/NR3B<br><i>n</i> = 3 | Glycine 200 $\mu$ M<br>NMDA 100 $\mu$ M    | 109.1 $\pm$ 1.5         |

**Supplemental References**

Baron BM, Siegel BW, Harrison BL, Gross RS, Hawes C, Towers P (1996) [<sup>3</sup>H]MDL 105,519, a high-affinity radioligand for the *N*-methyl-D-aspartate receptor-associated glycine recognition site. *J Pharmacol Exp Ther* 279: 62-68.

Baron BM, Siegel BW, Slone AL, Harrison BL, Palfreyman MG, Hurt SD (1991) [<sup>3</sup>H]5,7-dichlorokynurenic acid, a novel radioligand labels NMDA receptor-associated glycine binding sites. *Eur J Pharmacol* 206: 149-154.
